# Supplementary material for: Cardiac biomarkers for the detection of cardiotoxicity in childhood cancer—a meta‐analysis
Source: PubMed Central journal article supplement — ESC Heart Fail. 2020 Feb 18;7(2):423–33. doi: 10.1002/ehf2.12589 (PMC7160486; doi:10.1002/ehf2.12589), 2020-02-18
Supplement: EHF2-7-423-s002.pdf [file EHF2-7-423-s002.pdf]

## **Cardiac biomarkers for the detection of cardiotoxicity in childhood cancer – a meta-analysis**

Lars Michel, MD<sup>1</sup>; Raluca I. Mincu, MD, PhD<sup>1</sup>; Simone M. Mrotzek, MD<sup>1</sup>; Sebastian Korste, MSc<sup>1</sup>; Ulrich Neudorf, MD<sup>2</sup>; Tienush Rassaf, MD, FESC<sup>1</sup>, and Matthias Totzeck, MD, FESC<sup>1</sup>

<sup>1</sup>Department of Cardiology and Vascular Medicine, West German Heart and Vascular Center, Medical Faculty, University Hospital Essen, Hufelandstraße 55, 45147 Essen, Germany

<sup>2</sup>Department of Pediatrics, Medical Faculty, University Hospital Essen, Hufelandstraße 55, 45147 Essen, Germany

LM was supported by the IFORES research grant from the Medical Faculty, University Duisburg-Essen, Hufelandstraße 55, 45147 Essen, Germany. No other form of financial support was related to this work. No relationship with industry was related to this work.

### **Address for correspondence:**

Dr. Matthias Totzeck

Department of Cardiology and Vascular Medicine

West German Heart and Vascular Center

Medical Faculty, University Hospital Essen

Hufelandstr. 55, 45147 Essen, Germany

Phone: +49 201 723 84805

Fax: +49 201 723 5401

E-Mail: [Matthias.Totzeck@uk-essen.de](mailto:Matthias.Totzeck@uk-essen.de)

## **Supplementary methods**

### Search strategy

Cancer AND cardiotoxicity AND pediatric AND troponin

Cancer AND cardiotoxicity AND pediatric AND BNP

Cancer AND cardiotoxicity AND pediatric AND brain natriuretic peptide

Cancer AND cardiotoxicity AND children AND troponin

Cancer AND cardiotoxicity AND children AND BNP

Cancer AND cardiotoxicity AND children AND brain natriuretic peptide

Cancer AND cardiotoxicity AND childhood AND troponin

Cancer AND cardiotoxicity AND childhood AND BNP

Cancer AND cardiotoxicity AND childhood AND brain natriuretic peptide

### Assessment of bias

#### Quality Assessment of Diagnostic Accuracy Studies 2 (QUADAS-2) revised criteria

All included studies were assessed according to Quality Assessment of Diagnostic Accuracy Studies 2 (QUADAS-2) revised criteria (1). The risk of bias regarding patient selection, index test, reference standard, and flow and timing was judged based on the available information from the respective manuscripts. Risk of bias and applicability concerns were judged as “low risk”, “unclear risk” and “high risk”. Assessment of biomarkers was defined as index test, and determination of left ventricular (LV) function (left ventricular ejection fraction or fractional shortening) was defined as reference standard. No assessment of reference standard bias and applicability concerns was conducted when studies were not included for analyses regarding LV dysfunction.

Predefined criteria were applied as depicted below. Two investigators (LM, RIM) evaluated additional concerns regarding risk of bias or applicability that were found in individual studies and not listed within the predefined criteria individually.

#### Patient selection

- Use of pirarubicin: *Unclear or high risk/applicability concerns*
- Administration of dexrazoxane (only when data was insufficient to exclude patients):  
*Unclear or high risk/applicability concerns*
- Non-prospective design: *Unclear risk of bias*
- Exclusion of patients with symptomatic heart failure: *High risk of bias*
- Inappropriate exclusion criteria: *High risk of bias*

#### Index test

- Serial biomarker measurements: *Unclear or high risk of bias*

#### Reference standard

- No definition of LV dysfunction stated: *High risk of bias*

#### Flow and timing

- Exclusion of patients with symptomatic heart failure: *High risk of bias*
- Five years or more after therapy: *Unclear applicability concerns*
- Inappropriate exclusion criteria: *High risk of bias*

#### Newcastle-Ottawa Scale

The Newcastle-Ottawa Scale (NOS) for assessing the quality of nonrandomised studies in meta-analyses was applied to facilitate assessment of study quality (2). Studies received a maximum of 9 stars for eight questions (two stars can be allotted to question 5). Predefined criteria were applied as depicted below. Two investigators (LM, RIM) judged all studies individually and evaluated criteria that were not included within the list of predefined criteria.

Question 1: Is the selected cohort representative? (all of the following criteria)

- Use of anthracyclines other than pirarubicin
- No administration of dexrazoxane or sufficient data to exclude patients that received dexrazoxane
- No exclusion of patients with symptomatic heart failure

- No inappropriate exclusion criteria

Question 2: Is the selection of controls appropriate? (One or more of the following criteria)

- Studies that included a control group
- Studies that compared patients with a specific outcome (presence of LV dysfunction or presence of elevated biomarker) to patients without this outcome

Question 3: Is the ascertainment of exposure appropriate?

- Studies that included at least 100 mg/kg body weight doxorubicin or doxorubicin-equivalent dose

Question 4: Was demonstrated that the outcome of interest was not present at the start of the study?

- Prospective studies that assessed pre-treatment status

Question 5: Are the selected and control groups comparable concerning age/other controlled factors? (Maximum 2 stars)

- Studies that included a control group: +1 star
- Studies that included evaluation of LV function: +1 star
- Control collective of cancer patients receiving other-than anthracycline cancer therapy (instead of healthy individuals): +1 star

Question 6: Is the independent or blind assessment stated in the paper?

- Studies that stated blind assessment of LV function

Question 7: Was follow-up long enough for outcomes to occur?

- Studies that included at least 6 months follow-up after anthracycline therapy

Question 8: Was follow-up adequate?

- Studies that included at least 6 months follow-up after anthracycline therapy

### **Supplementary methods references**

1. Whiting PF, Rutjes AW, Westwood ME, Mallett S, Deeks JJ, Reitsma JB, et al. QUADAS-2: a revised tool for the quality assessment of diagnostic accuracy studies. *Ann Intern Med.* 2011;155(8):529-36.
2. Wells G, Shea B, O'Connell D, Peterson J, Welch V, Losos M, et al. The Newcastle-Ottawa Scale (NOS) for assessing the quality of nonrandomised studies in metaanalyses.

## Supplementary tables

### Online supplementary table 1. PRISMA checklist

| Section/topic             | # | Checklist item                                                                                                                                                                                                                                                                                              | Reported on page #  |
|---------------------------|---|-------------------------------------------------------------------------------------------------------------------------------------------------------------------------------------------------------------------------------------------------------------------------------------------------------------|---------------------|
| <b>TITLE</b>              |   |                                                                                                                                                                                                                                                                                                             |                     |
| Title                     | 1 | Identify the report as a systematic review, meta-analysis, or both.                                                                                                                                                                                                                                         | 1                   |
| <b>ABSTRACT</b>           |   |                                                                                                                                                                                                                                                                                                             |                     |
| Structured summary        | 2 | Provide a structured summary including, as applicable: background; objectives; data sources; study eligibility criteria, participants, and interventions; study appraisal and synthesis methods; results; limitations; conclusions and implications of key findings; systematic review registration number. | 2                   |
| <b>INTRODUCTION</b>       |   |                                                                                                                                                                                                                                                                                                             |                     |
| Rationale                 | 3 | Describe the rationale for the review in the context of what is already known.                                                                                                                                                                                                                              | 3-4                 |
| Objectives                | 4 | Provide an explicit statement of questions being addressed with reference to participants, interventions, comparisons, outcomes, and study design (PICOS).                                                                                                                                                  | 4                   |
| <b>METHODS</b>            |   |                                                                                                                                                                                                                                                                                                             |                     |
| Protocol and registration | 5 | Indicate if a review protocol exists, if and where it can be accessed (e.g., Web address), and, if available, provide registration information including registration number.                                                                                                                               | 4                   |
| Eligibility criteria      | 6 | Specify study characteristics (e.g., PICOS, length of follow-up) and report characteristics (e.g., years considered, language, publication status) used as criteria for eligibility, giving rationale.                                                                                                      | 4-5                 |
| Information sources       | 7 | Describe all information sources (e.g., databases with dates of coverage, contact with study authors to identify additional studies) in the search and date last searched.                                                                                                                                  | 4                   |
| Search                    | 8 | Present full electronic search strategy for at least one database, including any limits used, such that it could be repeated.                                                                                                                                                                               | 4, figure 1, online |

|                                    |    |                                                                                                                                                                                                                        |                                                         |
|------------------------------------|----|------------------------------------------------------------------------------------------------------------------------------------------------------------------------------------------------------------------------|---------------------------------------------------------|
|                                    |    |                                                                                                                                                                                                                        | suppl.<br>material                                      |
| Study selection                    | 9  | State the process for selecting studies (i.e., screening, eligibility, included in systematic review, and, if applicable, included in the meta-analysis).                                                              | 5-6, figure 1                                           |
| Data collection process            | 10 | Describe method of data extraction from reports (e.g., piloted forms, independently, in duplicate) and any processes for obtaining and confirming data from investigators.                                             | 4-5                                                     |
| Data items                         | 11 | List and define all variables for which data were sought (e.g., PICOS, funding sources) and any assumptions and simplifications made.                                                                                  | 4-5                                                     |
| Risk of bias in individual studies | 12 | Describe methods used for assessing risk of bias of individual studies (including specification of whether this was done at the study or outcome level), and how this information is to be used in any data synthesis. | 5                                                       |
| Summary measures                   | 13 | State the principal summary measures (e.g., risk ratio, difference in means).                                                                                                                                          | 4                                                       |
| Synthesis of results               | 14 | Describe the methods of handling data and combining results of studies, if done, including measures of consistency (e.g., I <sup>2</sup> ) for each meta-analysis.                                                     | 5                                                       |
| Risk of bias across studies        | 15 | Specify any assessment of risk of bias that may affect the cumulative evidence (e.g., publication bias, selective reporting within studies).                                                                           | 5                                                       |
| Additional analyses                | 16 | Describe methods of additional analyses (e.g., sensitivity or subgroup analyses, meta-regression), if done, indicating which were pre-specified.                                                                       | 4-5                                                     |
| <b>RESULTS</b>                     |    |                                                                                                                                                                                                                        |                                                         |
| Study selection                    | 17 | Give numbers of studies screened, assessed for eligibility, and included in the review, with reasons for exclusions at each stage, ideally with a flow diagram.                                                        | 6, figure 1                                             |
| Study characteristics              | 18 | For each study, present characteristics for which data were extracted (e.g., study size, PICOS, follow-up period) and provide the citations.                                                                           | online<br>suppl.<br>material                            |
| Risk of bias within studies        | 19 | Present data on risk of bias of each study and, if available, any outcome level assessment (see item 12).                                                                                                              | 8, figure 6,<br>online<br>suppl.<br>figure 4,<br>online |

|                               |    |                                                                                                                                                                                                          |                                                            |
|-------------------------------|----|----------------------------------------------------------------------------------------------------------------------------------------------------------------------------------------------------------|------------------------------------------------------------|
|                               |    |                                                                                                                                                                                                          | suppl. table 6                                             |
| Results of individual studies | 20 | For all outcomes considered (benefits or harms), present, for each study: (a) simple summary data for each intervention group (b) effect estimates and confidence intervals, ideally with a forest plot. | Figures                                                    |
| Synthesis of results          | 21 | Present results of each meta-analysis done, including confidence intervals and measures of consistency.                                                                                                  | 6-8, figures                                               |
| Risk of bias across studies   | 22 | Present results of any assessment of risk of bias across studies (see Item 15).                                                                                                                          | 8, figure 6, online suppl. figure 4, online suppl. table 6 |
| Additional analysis           | 23 | Give results of additional analyses, if done (e.g., sensitivity or subgroup analyses, meta-regression [see Item 16]).                                                                                    | 6-8                                                        |
| <b>DISCUSSION</b>             |    |                                                                                                                                                                                                          |                                                            |
| Summary of evidence           | 24 | Summarize the main findings including the strength of evidence for each main outcome; consider their relevance to key groups (e.g., healthcare providers, users, and policy makers).                     | 9                                                          |
| Limitations                   | 25 | Discuss limitations at study and outcome level (e.g., risk of bias), and at review-level (e.g., incomplete retrieval of identified research, reporting bias).                                            | 11                                                         |
| Conclusions                   | 26 | Provide a general interpretation of the results in the context of other evidence, and implications for future research.                                                                                  | 10-12                                                      |
| <b>FUNDING</b>                |    |                                                                                                                                                                                                          |                                                            |
| Funding                       | 27 | Describe sources of funding for the systematic review and other support (e.g., supply of data); role of funders for the systematic review.                                                               | 14                                                         |

Suppl., supplementary.

Modified from Moher D, Liberati A, Tetzlaff J, Altman DG, The PRISMA Group (2009). Preferred Reporting Items for Systematic Reviews and Meta-Analyses: The PRISMA Statement. PLoS Med 6(7): e1000097. doi:10.1371/journal.pmed1000097



**Online supplementary table 2. MOOSE checklist.**

| <b>Recommendation</b>                                                                                                                                                                                                                                                        | <b>Reported on Page No</b> |
|------------------------------------------------------------------------------------------------------------------------------------------------------------------------------------------------------------------------------------------------------------------------------|----------------------------|
| <b>Reporting of background should include</b>                                                                                                                                                                                                                                |                            |
| Problem definition                                                                                                                                                                                                                                                           | 3                          |
| Hypothesis statement                                                                                                                                                                                                                                                         | 3-4                        |
| Description of study outcome(s)                                                                                                                                                                                                                                              | 4                          |
| Type of exposure or intervention used                                                                                                                                                                                                                                        | 4-5                        |
| Type of study designs used                                                                                                                                                                                                                                                   | 4                          |
| Study population                                                                                                                                                                                                                                                             | 4                          |
| <b>Reporting of search strategy should include</b>                                                                                                                                                                                                                           |                            |
| Qualifications of searchers (eg, librarians and investigators)                                                                                                                                                                                                               | Not stated                 |
| Search strategy, including time period included in the synthesis and key words                                                                                                                                                                                               | 4, online suppl. material  |
| Effort to include all available studies, including contact with authors                                                                                                                                                                                                      | 4                          |
| Databases and registries searched                                                                                                                                                                                                                                            | 4                          |
| Search software used, name and version, including special features used (eg, explosion)                                                                                                                                                                                      | Not stated                 |
| Use of hand searching (eg, reference lists of obtained articles)                                                                                                                                                                                                             | online suppl. material     |
| List of citations located and those excluded, including justification                                                                                                                                                                                                        | figure 1                   |
| Method of addressing articles published in languages other than English                                                                                                                                                                                                      | 4, figure 1                |
| Method of handling abstracts and unpublished studies                                                                                                                                                                                                                         | 4, figure 1                |
| Description of any contact with authors                                                                                                                                                                                                                                      | None.                      |
| <b>Reporting of methods should include</b>                                                                                                                                                                                                                                   |                            |
| Description of relevance or appropriateness of studies assembled for assessing the hypothesis to be tested                                                                                                                                                                   | 4-5                        |
| Rationale for the selection and coding of data (eg, sound clinical principles or convenience)                                                                                                                                                                                | 4-5                        |
| Documentation of how data were classified and coded (eg, multiple raters, blinding and interrater reliability)                                                                                                                                                               | 5                          |
| Assessment of confounding (eg, comparability of cases and controls in studies where appropriate)                                                                                                                                                                             | 4-5                        |
| Assessment of study quality, including blinding of quality assessors, stratification or regression on possible predictors of study results                                                                                                                                   | 5                          |
| Assessment of heterogeneity                                                                                                                                                                                                                                                  | 5                          |
| Description of statistical methods (eg, complete description of fixed or random effects models, justification of whether the chosen models account for predictors of study results, dose-response models, or cumulative meta-analysis) in sufficient detail to be replicated | 5                          |
| Provision of appropriate tables and graphics                                                                                                                                                                                                                                 | 5                          |
| <b>Reporting of results should include</b>                                                                                                                                                                                                                                   |                            |

|                                                                                                                           |                                     |
|---------------------------------------------------------------------------------------------------------------------------|-------------------------------------|
| Graphic summarizing individual study estimates and overall estimate                                                       | Figure 2-5                          |
| Table giving descriptive information for each study included                                                              | Online suppl. table 3               |
| Results of sensitivity testing (eg, subgroup analysis)                                                                    | Table 2, online suppl. table 4-5    |
| Indication of statistical uncertainty of findings                                                                         | 6-8                                 |
| <b>Reporting of discussion should include</b>                                                                             |                                     |
| Quantitative assessment of bias (eg, publication bias)                                                                    | 8                                   |
| Justification for exclusion (eg, exclusion of non-English language citations)                                             | Figure 1                            |
| Assessment of quality of included studies                                                                                 | 8, figure 6, online suppl. figure 4 |
| <b>Reporting of conclusions should include</b>                                                                            |                                     |
| Consideration of alternative explanations for observed results                                                            | 10                                  |
| Generalization of the conclusions (ie, appropriate for the data presented and within the domain of the literature review) | 11                                  |
| Guidelines for future research                                                                                            | 11                                  |
| Disclosure of funding source                                                                                              | 12                                  |

Suppl., supplemental.

Modified from Stroup DF, Berlin JA, Morton SC, Olkin I, Williamson GD, Rennie D, et al. Meta-analysis of observational studies in epidemiology: a proposal for reporting. Meta-analysis Of Observational Studies in Epidemiology (MOOSE) group. JAMA 2000;283:2008–12. Copy righted © 2000, American Medical Association. All rights reserved.

Online supplementary table 3. Study characteristics.

| Study         | Pro-spective | Age of patients | Cancer entity         | Drug, cumulative dose                                                            | Biomarker          | Troponin cutoff | BNP/NT-proBNP cutoff | Timing of biomarker assessment                          | Definition LV dysfunction | Form of analysis |
|---------------|--------------|-----------------|-----------------------|----------------------------------------------------------------------------------|--------------------|-----------------|----------------------|---------------------------------------------------------|---------------------------|------------------|
| Aggarwal 2007 | No           | 13              | Various, 46% ALL      | Drug N/A, $\bar{x}$ = 165 mg/m <sup>2</sup>                                      | BNP                |                 |                      | 3.8 years after ANT                                     | FS <29%<br>EF <64%        | b)               |
| Arslan 2013   | No           | 8               | Various, 70% lymphoma | Drug N/A, $\bar{x}$ = 150 mg/m <sup>2</sup>                                      | Trop. I            | >0.16µg/mL      |                      | 1.9 years after last ANT                                |                           |                  |
| Asselin 2016  | Yes          | 10              | Various hematological | Doxorubicin, 360 mg/m <sup>2</sup>                                               | Trop. T            | >0.01 ng/mL     |                      | Immediately before ANT, 3 weeks after completion of ANT |                           |                  |
| Cetin 2018    | No           | 11              | Various, 50% lymphoma | Doxorubicin ± daunorubicin, dose N/A                                             | BNP                |                 | >100 pg/mL           | <1.8 years after ANT                                    |                           |                  |
| Clark 2007    | Yes          | 10              | Various, 50% ALL      | Doxorubicin and/or daunorubicin $\bar{x}$ = 150 mg/m <sup>2</sup>                | Trop. T            | >10 pg/mL       |                      | <48 h after ANT                                         |                           |                  |
| Ekstein 2007  | Yes          | 10              | Various, 40% leukemia | Various drugs, $\bar{x}$ = 180 mg/m <sup>2</sup>                                 | NT-proBNP          |                 | >350 pg/mL           | Before each ANT cycle                                   | FS <28%                   | a)               |
| Erkus 2007    | Yes          | 7               | Leukemia              | Doxorubicin, daunorubicin and/or idarubicin $\bar{x}$ = 181.64 mg/m <sup>2</sup> | Trop. I, BNP       | >0.04 ng/mL     |                      | After ANT, not further specified                        | FS <29%<br>EF <55%        | c)               |
| Fink 1995     | Yes          | 7               | Various, 45% leukemia | Adriamycin, daunorubicin, idarubicin, $\bar{x}$ = 180 mg/m <sup>2</sup>          | Trop. T            | >0.14 µg/L      |                      | >72 h after ANT cycles                                  |                           |                  |
| Gupta 2018    | Yes          | 9               | Various hematological | Drug N/A $\bar{x}$ = 268.40 mg/m <sup>2</sup>                                    | Trop. I, NT-proBNP | >0.02 ng/mL     | >100 pg/mL           | 6 months after start of ANT                             | EF relative decline ≥20%  |                  |
| Hayakawa 2001 | No           | 12              | N/A                   | Doxorubicin, $\bar{x}$ = 314 mg/m <sup>2</sup>                                   | BNP                |                 | >13 pg/mL            | >1 month after last ANT                                 | FS <30%<br>EF <60%        | a)<br>b)         |

|                           |     |    |                       |                                                                                |                    |                                             |                                                  |                                                                                  |                          |                |
|---------------------------|-----|----|-----------------------|--------------------------------------------------------------------------------|--------------------|---------------------------------------------|--------------------------------------------------|----------------------------------------------------------------------------------|--------------------------|----------------|
| Kismet 2004               | No  | 14 | Various solid         | Doxorubicin, $\bar{x}$ = 480 mg/m <sup>2</sup>                                 | Trop. T            | ≥0.01 ng/ml                                 |                                                  | 12 months after last ANT                                                         | FS <29%<br>EF <55%       | c)             |
| Kremer 2002               | Yes | 10 | Various hematological | Various, including mitoxantrone $\bar{x}$ = 255 mg/m <sup>2</sup>              | Trop. T            | >0.01 ng/mL                                 |                                                  | 24 h after ANT                                                                   | FS <30%; FS decline >15% | c)             |
| Kunarahah 2017            | Yes | 8  | Various, 29% ALL      | Doxorubicin, $\bar{x}$ = 95 mg/m <sup>2</sup>                                  | Trop. I            | ≥0.04 µg/L                                  |                                                  | 5 min-120 h after ANT                                                            |                          |                |
| Leger 2017                | Yes | 11 | Various, 33% AML      | Various including mitoxantrone, $\bar{x}$ = 102 mg/m <sup>2</sup>              | Trop. T            | ≥14 ng/L; ≥5 ng/L higher than pre-treatment |                                                  | 6-24 h after one ANT cycle                                                       |                          |                |
| Lipshultz 2012            | Yes | 8  | ALL                   | Doxorubicin, 300 mg/m <sup>2</sup>                                             | Trop. T, NT-proBNP | Any detectable amount                       | Age <1 year: ≥150 pg/mL; age ≥1 year: ≥150 pg/mL | Day 1-7 after ANT induction; 7 day 7 after ANT consolidation; end of ANT therapy |                          |                |
| Mavinkurve-Groothuis 2009 | No  | 21 | Various, 30% ALL      | Doxorubicin, daunorubicin $\bar{x}$ = 180 mg/m <sup>2</sup>                    | Trop. T, NT-proBNP | ≥0.01 ng/mL                                 | Age-dependent*                                   | 13.8 years after cancer diagnosis                                                | FS <29%<br>EF <55%       | a)             |
| Mavinkurve-Groothuis 2013 | Yes | 6  | ALL                   | Various, including mitoxantrone $\bar{x}$ = 300 mg/m <sup>2</sup>              | Trop. T, NT-proBNP | >0.01 ng/mL                                 | Age-dependent*                                   | 3 month; 1 year after diagnosis                                                  |                          |                |
| Pinarli 2005              | No  | 12 | Various, 65% lymphoma | Doxorubicin, ± epirubicin or daunorubicin $\bar{x}$ = 259.26 mg/m <sup>2</sup> | BNP                |                                             | >9.27 pg/mL                                      | 3.8 years after diagnosis                                                        |                          |                |
| Pongprot 2012             | No  | 10 | Various, 63% leukemia | Doxorubicin, $\bar{x}$ = 300 mg/m <sup>2</sup>                                 | Trop. T, NT-proBNP | >0.01 ng/mL                                 | Age-dependent***                                 | Shortly before, or >1 month after ANT                                            | FS <29%<br>EF <55%       | a)<br>b)<br>c) |
| Pourier 2015              | No  | 16 | Leukemia              | Drug N/A $\bar{x}$ = 225 mg/m <sup>2</sup>                                     | Trop. T, NT-proBNP | >13.5 ng/L                                  | Age-dependent**                                  | 8.3 years after cancer diagnosis                                                 | FS ≤27%<br>EF ≤55%       | a)<br>c)       |
| Ruggiero 2013             | Yes | 6  | ALL                   | Doxorubicin, 240 mg/m <sup>2</sup>                                             | Trop. T, NT-proBNP | >0.01 ng/mL                                 | Age-dependent*                                   | 2 h, 24 h after ANT cycle                                                        | EF decline >20%;         |                |

|                   |     |    |                       |                                                                   |                       |                                                            |                                         |                                    |                                                    |    |
|-------------------|-----|----|-----------------------|-------------------------------------------------------------------|-----------------------|------------------------------------------------------------|-----------------------------------------|------------------------------------|----------------------------------------------------|----|
|                   |     |    |                       |                                                                   |                       |                                                            |                                         |                                    | EF decline >10% to <55%                            |    |
| Shimomura 2011    | No  | 15 | ALL                   | Pirarubicin, Doxorubicin<br>$\bar{x}$ = 207 mg/m <sup>2</sup>     | BNP                   |                                                            |                                         | 8.1 years after cancer diagnosis   | FS <28%<br>EF <54%                                 |    |
| Soker 2005        | No  | 8  | Various hematological | Doxorubicin,<br>$\bar{x}$ = 227.26 mg/m <sup>2</sup>              | Trop. I, NT-proBNP    | ≥0.5 ng/mL                                                 |                                         | 9.39 month after last ANT          | FS <30%<br>EF <60%                                 | b) |
| Tragiannidis 2012 | Yes | 7  | Various hematological | Drug N/A,<br>Dose N/A                                             | BNP                   |                                                            |                                         | After completion of ANT            | FS <29%<br>EF <64%                                 |    |
| Urbanova 2010     | No  | 23 | Leukemia              | Doxorubicin and daunorubicin<br>$\bar{x}$ = 221 mg/m <sup>2</sup> | Trop. T, BNP          | >0.01 ng/mL                                                |                                         | 10.5 years after completion of ANT |                                                    |    |
| Yildirim 2013     | No  | 17 | ALL                   | Doxorubicin,<br>$\bar{x}$ = 200 mg/m <sup>2</sup>                 | NT-proBNP             |                                                            | >100 pg/mL                              | 10.5 years after completion of ANT |                                                    |    |
| Ylänen 2015       | No  | 14 | Various, 55% leukemia | Drug N/A,<br>224 mg/m <sup>2</sup>                                | Trop. T, I, NT-proBNP | Trop. T: >0.03 µg/L<br>hsTrop. T: >14 ng/L<br>Trop. I: N/A | males: >63 pg/mL<br>females: >116 pg/mL | 9.0 years after cancer diagnosis   | Echo: EF <50%<br>excluded: FS <28%<br>MRI: EF <55% | a) |

Control groups are not included within number of patients. Studies including sufficient data on cardiac biomarkers and LV function were included to one or more of the following forms of analysis as indicated:

- Analysis of LV dysfunction in patients with elevated BNP/NT-proBNP compared to patients with non-elevated troponin.
- Analysis of absolute BNP/NT-proBNP levels in patients with LV dysfunction compared to patients with preserved LV function.
- Analysis of LV dysfunction in patients with elevated troponin compared to patients with non-elevated troponin.

ALL, acute lymphoblastic leukemia, AML, acute myeloid leukemia, ANT, anthracycline; BNP, brain natriuretic peptide; echo, echocardiography; EF, ejection fraction; FS, fractional shortening; hs, high sensitivity; MRI, magnetic resonance imaging; NT-proBNP, N-terminal pro brain natriuretic peptide; N/A, not available (not stated within the manuscript of the respective study); Trop., troponin.

\* Albers S, Mir TS, Haddad M, Laer S. N-Terminal pro-brain natriuretic peptide: normal ranges in the pediatric population including method comparison and interlaboratory variability. *Clinical chemistry and laboratory medicine*. 2006;44(1):80-85.

\*\*Fradley MG, Larson MG, Cheng S, McCabe E, Coglianese E, Shah RV, Levy D, Vasan RS, Wang TJ. Reference limits for N-terminal-pro-B-type natriuretic peptide in healthy individuals (from the Framingham Heart Study). *The American journal of cardiology*. 2011 Nov 1;108(9):1341-1345.

Nir A, Lindinger A, Rauh M, Bar-Oz B, Laer S, Schwachtgen L, Koch A, Falkenberg J, Mir TS. NT-pro-B-type natriuretic peptide in infants and children: reference values based on combined data from four studies. *Pediatric cardiology*. 2009 Jan;30(1):3-8.

\*\*\*Nir A, Lindinger A, Rauh M, Bar-Oz B, Laer S, Schwachtgen L, Koch A, Falkenberg J, Mir TS. NT-pro-B-type natriuretic peptide in infants and children: reference values based on combined data from four studies. *Pediatric cardiology*. 2009 Jan;30(1):3-8.

**Online supplementary table 4: Diagnostic accuracy of BNP/NT-proBNP for acute/subacute LV dysfunction**

|                      | LV dysf.           | no LV dysf.        |            |       |
|----------------------|--------------------|--------------------|------------|-------|
| <b>Positive test</b> | 10                 | 6                  | <b>PPV</b> | 0.625 |
| <b>Negative test</b> | 9                  | 63                 | <b>NPV</b> | 0.875 |
|                      | <b>Sensitivity</b> | <b>Specificity</b> |            |       |
|                      | 0.526              | 0.913              |            |       |

BNP, brain natriuretic peptide; LV dysf., left ventricular dysfunction; NT-proBNP, N-terminal pro brain natriuretic peptide; NPV, negative predictive value; PPV, positive predictive value.

**Online supplementary table 5: Diagnostic accuracy of BNP/NT-proBNP for LV dysfunction in survivors of childhood cancer**

|                      | LV dysf.           | no LV dysf.        |            |       |
|----------------------|--------------------|--------------------|------------|-------|
| <b>Positive test</b> | 5                  | 20                 | <b>PPV</b> | 0.200 |
| <b>Negative test</b> | 21                 | 216                | <b>NPV</b> | 0.911 |
|                      | <b>Sensitivity</b> | <b>Specificity</b> |            |       |
|                      | 0.238              | 0.915              |            |       |

BNP, brain natriuretic peptide; LV dysf., left ventricular dysfunction; NT-proBNP, N-terminal pro brain natriuretic peptide; NPV, negative predictive value; PPV, positive predictive value.

**Online supplementary table 6: Assessment of bias using the Newcastle-Ottawa Scale**

| <b>Study</b>  | Is the selected cohort representative? | Is the selection of controls appropriate? | Is the ascertainment of exposure appropriate? | Was demonstrated that the outcome of interest was not present at the start of the study? | Are the selected and control groups comparable concerning age/other controlled factors? | Is the independent or blind assessment stated in the paper? | Was follow-up long enough for outcomes to occur? | Was follow-up adequate? | <b>Total number of stars</b> |
|---------------|----------------------------------------|-------------------------------------------|-----------------------------------------------|------------------------------------------------------------------------------------------|-----------------------------------------------------------------------------------------|-------------------------------------------------------------|--------------------------------------------------|-------------------------|------------------------------|
| Aggarwal 2007 |                                        | *                                         | *                                             |                                                                                          | **                                                                                      | *                                                           | *                                                | *                       | 6                            |
| Arslan 2013   | *                                      | *                                         | *                                             |                                                                                          | *                                                                                       |                                                             | *                                                | *                       | 8                            |
| Asselin 2016  | *                                      |                                           | *                                             | *                                                                                        |                                                                                         | *                                                           | *                                                | *                       | 5                            |
| Cetin 2018    | *                                      | *                                         |                                               |                                                                                          | *                                                                                       | *                                                           | *                                                | *                       | 9                            |
| Clark 2007    | *                                      |                                           | *                                             | *                                                                                        |                                                                                         |                                                             | *                                                | *                       | 4                            |
| Ekstein 2007  | *                                      | *                                         | *                                             | *                                                                                        | **                                                                                      | *                                                           |                                                  | *                       | 7                            |
| Erkus 2007    | *                                      | *                                         | *                                             | *                                                                                        | **                                                                                      | *                                                           |                                                  | *                       | 5                            |
| Fink 1995     | *                                      |                                           | *                                             | *                                                                                        |                                                                                         | *                                                           |                                                  | *                       | 4                            |
| Gupta 2018    | *                                      |                                           | *                                             | *                                                                                        |                                                                                         | *                                                           | *                                                | *                       | 8                            |
| Hayakawa 2001 |                                        | *                                         | *                                             |                                                                                          | **                                                                                      | *                                                           |                                                  |                         | 6                            |
| Kismet 2004   |                                        | *                                         | *                                             |                                                                                          | **                                                                                      | *                                                           | *                                                |                         | 7                            |
| Kremer 2002   | *                                      | *                                         | *                                             | *                                                                                        | **                                                                                      | *                                                           |                                                  | *                       | 5                            |



|                               |   |   |   |   |    |   |   |   |   |
|-------------------------------|---|---|---|---|----|---|---|---|---|
| Kunarajah 2017                | * |   |   | * |    | * | * | * | 5 |
| Leger 2017                    |   | * | * | * | ** | * |   |   | 5 |
| Lipshultz 2012                | * |   | * | * |    | * | * | * | 8 |
| Mavinkurve-<br>Groothuis 2009 |   | * | * |   | ** | * | * | * | 7 |
| Mavinkurve-<br>Groothuis 2013 | * | * | * | * | *  | * | * |   | 7 |
| Pinarli 2005                  | * | * | * |   | *  | * | * |   | 7 |
| Pongprot 2012                 | * | * | * |   | ** | * |   |   | 5 |
| Pourier 2015                  | * | * | * |   | ** | * | * | * | 6 |
| Ruggiero 2013                 | * |   | * | * |    | * | * | * | 6 |
| Shimomura 2011                |   | * | * |   | *  | * | * | * | 8 |
| Soker 2005                    | * | * | * |   | ** |   |   | * | 7 |
| Tragiannidis 2012             | * |   |   | * |    | * |   | * | 5 |
| Urbanova 2010                 | * | * | * |   | *  | * | * | * | 9 |
| Yildirim 2013                 | * | * | * |   | *  |   | * | * | 8 |
| Ylänen 2015                   |   | * | * |   | ** |   | * | * | 5 |

## **Supplementary figure legends**

**Online supplementary figure 1. BNP/NT-proBNP for the detection of LV dysfunction in young and old studies.** Frequency of BNP/NT-proBNP elevation post-treatment compared to pre-treatment or control cohort for studies prior to 2011 and studies from 2011 and younger separately. Parallelogram boxes denote the odds ratio, and horizontal lines represent the 95% confidence interval. BNP, brain natriuretic peptide; NT-proBNP, N-terminal pro BNP.

**Online supplementary figure 2. BNP/NT-proBNP for the detection of LV dysfunction within high-dose and low-doses anthracycline treatment subgroups.** A, frequency of LV dysfunction in patients with elevated BNP/NT-proBNP compared to patients without elevated BNP/NT-proBNP post-treatment in patients receiving 240-600 mg/m<sup>2</sup> compared to patients receiving <240 mg/m<sup>2</sup> cumulative doxorubicin or doxorubicin-equivalent dose. B, absolute BNP/NT-proBNP levels in patients with LV dysfunction compared to patients without LV dysfunction post-treatment in patients receiving 240-600 mg/m<sup>2</sup> compared to patients receiving <240 mg/m<sup>2</sup> cumulative doxorubicin or doxorubicin-equivalent dose. Parallelogram boxes denote the odds ratio or standardized mean difference, and horizontal lines represent the 95% confidence interval. Std, standardized.

**Online supplementary figure 3. BNP and NT-proBNP subgroups for the detection of LV dysfunction.** Absolute BNP levels and NT-proBNP levels separately in patients with LV dysfunction compared to patients without LV dysfunction post-treatment. Parallelogram boxes denote the standardized mean difference, and horizontal lines represent the 95% confidence interval. Std., standardized.

**Online supplementary figure 4. Absolute troponin I levels compared to troponin T levels post-treatment.** Absolute troponin I levels and troponin T levels separately in patients with LV dysfunction compared to patients without LV dysfunction post-treatment. Parallelogram boxes denote the standardized mean difference, and horizontal lines represent the 95% confidence interval. Std., standardized.

**Online supplementary figure 5. Individual bias assessment.** Risk of bias and applicability concerns judgement for single studies.

**Online supplementary figure 6. Analysis of heterogeneity.** Funnel plot of dichotomous analysis of BNP/NT-proBNP in children with cancer or survivors of childhood cancer post-treatment compared to pre-treatment or control cohort when pre-treatment values were not available. BNP, brain natriuretic peptide; NT-proBNP, N-terminal pro BNP; SE, standard error; SMD, standardized mean difference.

### **Supplemental references: Included studies**

1. Gupta V, Kumar Singh S, Agrawal V, Bali Singh T. Role of ACE inhibitors in anthracycline-induced cardiotoxicity: A randomized, double-blind, placebo-controlled trial. *Pediatr Blood Cancer* 2018;65:e27308.
2. Cetin S, Babaoglu K, Basar EZ, Deveci M, Corapcioglu F. Subclinical anthracycline-induced cardiotoxicity in long-term follow-up of asymptomatic childhood cancer survivors: Assessment by speckle tracking echocardiography. *Echocardiography* 2018;35:234-240.
3. Leger KJ, Leonard D, Nielson D, de Lemos JA, Mammen PP, Winick NJ. Circulating microRNAs: Potential Markers of Cardiotoxicity in Children and Young Adults Treated With Anthracycline Chemotherapy. *J Am Heart Assoc* 2017;6.
4. Kunarajah K, Hennig S, Norris RLG et al. Population pharmacokinetic modelling of doxorubicin and doxorubicinol in children with cancer: is there a relationship with cardiac troponin profiles? *Cancer Chemother Pharmacol* 2017;80:15-25.
5. Asselin BL, Devidas M, Chen L et al. Cardioprotection and Safety of Dexrazoxane in Patients Treated for Newly Diagnosed T-Cell Acute Lymphoblastic Leukemia or Advanced-Stage Lymphoblastic Non-Hodgkin Lymphoma: a Report of the Children's Oncology Group Randomized Trial Pediatric Oncology Group 9404. *J Clin Oncol* 2016;34:854-862.
6. Ylanen K, Poutanen T, Savukoski T, Eerola A, Vettenranta K. Cardiac biomarkers indicate a need for sensitive cardiac imaging among long-term childhood cancer survivors exposed to anthracyclines. *Acta Paediatr* 2015;104:313-9.
7. Pourier MS, Kapusta L, van Gennip A et al. Values of high sensitive troponin T in long-term survivors of childhood cancer treated with anthracyclines. *Clin Chim Acta* 2015;441:29-32.
8. Yildirim A, Tunaoglu FS, Kambur K, Pinarli FG. The utility of NT-proBNP and various echocardiographic methods in the determination of doxorubicin induced subclinical late cardiotoxicity. *Kardiol Pol* 2013;71:40-6.

9. Ruggiero A, De Rosa G, Rizzo D et al. Myocardial performance index and biochemical markers for early detection of doxorubicin-induced cardiotoxicity in children with acute lymphoblastic leukaemia. *Int J Clin Oncol* 2013;18:927-33.
10. Mavinkurve-Groothuis AM, Marcus KA, Pourier M et al. Myocardial 2D strain echocardiography and cardiac biomarkers in children during and shortly after anthracycline therapy for acute lymphoblastic leukaemia (ALL): a prospective study. *Eur Heart J Cardiovasc Imaging* 2013;14:562-9.
11. Arslan D, Cihan T, Kose D et al. Growth-differentiation factor-15 and tissue doppler imaging in detection of asymptomatic anthracycline cardiomyopathy in childhood cancer survivors. *Clin Biochem* 2013;46:1239-43.
12. Tragiannidis A, Dokos C, Tsotoulidou V et al. Brain natriuretic peptide as a cardiotoxicity biomarker in children with hematological malignancies. *Minerva Pediatr* 2012;64:307-12.
13. Pongprot Y, Sittiwangkul R, Charoenkwan P, Silvilairat S. Use of cardiac markers for monitoring of doxorubicin-induced cardiotoxicity in children with cancer. *J Pediatr Hematol Oncol* 2012;34:589-95.
14. Lipshultz SE, Miller TL, Scully RE et al. Changes in cardiac biomarkers during doxorubicin treatment of pediatric patients with high-risk acute lymphoblastic leukemia: associations with long-term echocardiographic outcomes. *J Clin Oncol* 2012;30:1042-9.
15. Shimomura Y, Baba R, Watanabe A et al. Assessment of late cardiotoxicity of pirarubicin (THP) in children with acute lymphoblastic leukemia. *Pediatr Blood Cancer* 2011;57:461-6.
16. Urbanova D, Urban L, Simkova I, Danova K, Mikuskova E, Mladoslaviceva B. Long-term cardiac effects of treatment for childhood leukemia. *Neoplasma* 2010;57:179-83.
17. Mavinkurve-Groothuis AM, Groot-Loonen J, Bellersen L et al. Abnormal NT-pro-BNP levels in asymptomatic long-term survivors of childhood cancer treated with anthracyclines. *Pediatr Blood Cancer* 2009;52:631-6.

18. Erkus B, Demirtas S, Yarpuzlu AA, Can M, Genc Y, Karaca L. Early prediction of anthracycline induced cardiotoxicity. *Acta Paediatr* 2007;96:506-9.
19. Ekstein S, Nir A, Rein AJ et al. N-terminal-proB-type natriuretic peptide as a marker for acute anthracycline cardiotoxicity in children. *J Pediatr Hematol Oncol* 2007;29:440-4.
20. Clark SJ, Pippon M, Hemsworth S, Newland P, Pizer B. Cardiac troponin T following anthracycline chemotherapy in children and adolescents. *J Chemother* 2007;19:332-4.
21. Aggarwal S, Pettersen MD, Bhambhani K, Gurczynski J, Thomas R, L'Ecuyer T. B-type natriuretic peptide as a marker for cardiac dysfunction in anthracycline-treated children. *Pediatr Blood Cancer* 2007;49:812-6.
22. Soker M, Kervancioglu M. Plasma concentrations of NT-pro-BNP and cardiac troponin-I in relation to doxorubicin-induced cardiomyopathy and cardiac function in childhood malignancy. *Saudi Med J* 2005;26:1197-202.
23. Pinarli FG, Oguz A, Tunaoglu FS, Karadeniz C, Gokcora N, Elbeg S. Late cardiac evaluation of children with solid tumors after anthracycline chemotherapy. *Pediatr Blood Cancer* 2005;44:370-7.
24. Kismet E, Varan A, Ayabakan C, Alehan D, Portakal O, Buyukpamukcu M. Serum troponin T levels and echocardiographic evaluation in children treated with doxorubicin. *Pediatr Blood Cancer* 2004;42:220-4.
25. Kremer LC, Bastiaansen BA, Offringa M et al. Troponin T in the first 24 hours after the administration of chemotherapy and the detection of myocardial damage in children. *Eur J Cancer* 2002;38:686-9.
26. Hayakawa H, Komada Y, Hirayama M, Hori H, Ito M, Sakurai M. Plasma levels of natriuretic peptides in relation to doxorubicin-induced cardiotoxicity and cardiac function in children with cancer. *Med Pediatr Oncol* 2001;37:4-9.

27. Fink FM, Genser N, Fink C et al. Cardiac troponin T and creatine kinase MB mass concentrations in children receiving anthracycline chemotherapy. *Med Pediatr Oncol* 1995;25:185-9.
